# Supplementary material for: The impact of solvation on the structure and electric field strength in Li+GlyGly complexes
Source: Royal Society of Chemistry journal article supplement (doi:10.1039/d3cp06264c), 2024-01-01
Supplement: d3cp06264c1.pdf [file d3cp06264c1.pdf]

## Supporting Information:

# The impact of solvation on the structure and electric field strength in Li<sup>+</sup> GlyGly complexes

Katharina A. E. Meyer and Etienne Garand\*

*University of Wisconsin-Madison, Department of Chemistry, 1101 University Ave, Madison, WI 53706.  
E-mail: egarand@wisc.edu*

## Contents

|                                                                                        |            |
|----------------------------------------------------------------------------------------|------------|
| <b>1 Computational Methods</b>                                                         | <b>S2</b>  |
| <b>2 Spectral analysis of the Li<sup>+</sup> GlyGly-<i>n</i>H<sub>2</sub>O spectra</b> | <b>S4</b>  |
| 2.1 Overview over the experimental results                                             | S4         |
| 2.2 Conformer assignments                                                              | S4         |
| <b>3 Agreement between experiment and theory</b>                                       | <b>S6</b>  |
| <b>4 Tentative analysis of the Li<sup>+</sup> GlyGly-3H<sub>2</sub>O spectra</b>       | <b>S8</b>  |
| <b>References</b>                                                                      | <b>S10</b> |

## List of Tables

|    |                                                                                                                                                                                                                                                      |    |
|----|------------------------------------------------------------------------------------------------------------------------------------------------------------------------------------------------------------------------------------------------------|----|
| S1 | Keywords used in harmonic vibrational frequency and single-point calculations.                                                                                                                                                                       | S2 |
| S2 | DLPNO-CCSD(T)/aVQZ* single-point energies on geometries obtained with various methods.                                                                                                                                                               | S3 |
| S3 | Comparison of Li <sup>+</sup> GlyGly- <i>n</i> H <sub>2</sub> O ( <i>n</i> = 0, 1) band position predictions with and without the inclusion of the D <sub>2</sub> messenger tag.                                                                     | S3 |
| S4 | Experimental band positions and conformer assignments.                                                                                                                                                                                               | S4 |
| S5 | BSSE corrected relative Gibbs free energy differences of the lowest-energy conformers of Li <sup>+</sup> GlyGly- <i>n</i> H <sub>2</sub> O ( <i>n</i> = 1, 2) calculated at various levels of theory.                                                | S4 |
| S6 | Zero-point and BSSE corrected relative energy differences of the lowest-energy conformers of Li <sup>+</sup> GlyGly- <i>n</i> H <sub>2</sub> O ( <i>n</i> = 1, 2) calculated at various levels of theory.                                            | S5 |
| S7 | Deviations between band position predictions and experiments for all vibrational modes assigned in the spectra of Li <sup>+</sup> GlyGly- <i>n</i> H <sub>2</sub> O-1D <sub>2</sub> ( <i>n</i> = 0, 1) and Li <sup>+</sup> GlyGly-2H <sub>2</sub> O. | S6 |
| S8 | Cross-calculations with and without dispersion correction for the lowest-energy conformers of Li <sup>+</sup> GlyGly-1H <sub>2</sub> O.                                                                                                              | S7 |
| S9 | Cross-calculations with and without dispersion correction for the lowest-energy conformers of Li <sup>+</sup> GlyGly-2H <sub>2</sub> O.                                                                                                              | S7 |

## List of Figures

|    |                                                                                                                                                               |    |
|----|---------------------------------------------------------------------------------------------------------------------------------------------------------------|----|
| S1 | Basis set progression of DLPNO-CCSD(T)/aVXZ*//MP2/aVTZ energies.                                                                                              | S3 |
| S2 | Lowest-energy conformations of the Li <sup>+</sup> GlyGly- <i>n</i> H <sub>2</sub> O complexes with <i>n</i> = 1 and 2.                                       | S5 |
| S3 | Conformers of Li <sup>+</sup> GlyGly-3H <sub>2</sub> O below 10 kJ mol <sup>-1</sup> .                                                                        | S8 |
| S4 | Infrared action spectra of Li <sup>+</sup> GlyGly-3H/D <sub>2</sub> O alongside scaled, harmonic B3LYP/def2TZVP calculations of the lowest-energy conformers. | S9 |

# 1 Computational Methods

A detailed list of keywords used in the harmonic vibrational frequency calculations as well as wavenumber scaling factors can be found in Table S1. Relative DLPNO-CCSD(T)/aVQZ\* single-point energies based on the lowest-energy structures of the Li<sup>+</sup>GlyGly-*n*H<sub>2</sub>O complexes with  $n = 0 - 2$  calculated using various methods are listed in Table S2 and a basis set progression of zero-point corrected DLPNO-CCSD(T)/aVXZ//MP2/aVTZ\* energies and Gibbs free energies is shown in Figure S1. To validate that the impact on the band position predictions upon the inclusion of the weakly bound D<sub>2</sub> messenger tag is small, we list the band position deviations of scaled harmonic B3LYP-D3(BJ)/def2TZVP calculations of Li<sup>+</sup>GlyGly-*n*H<sub>2</sub>O and Li<sup>+</sup>GlyGly-*n*H<sub>2</sub>O-1D<sub>2</sub> ( $n = 0, 1$ ) with respect to experiment in Table S3. The differences in the average absolute deviations including all observed vibrational modes with and without the inclusion of the tag are with just 0.1 cm<sup>-1</sup> very small (14.0 cm<sup>-1</sup> with D<sub>2</sub> and 14.1 cm<sup>-1</sup> without).

**Table S1:** Keywords used in harmonic vibrational frequency (DFT and MP2) and single-point calculations (DLPNO-CCSD(T)) performed with GAUSSIAN 16 (version C.01)[1] and ORCA (version 4.2.1).[2-4] Note that for M06-2X, additional calculations using the finer *superfine* integration grid have been carried out to test the integration grid sensitivity of the method. If not otherwise noted, only results using the coarser *ultrafine* integration grid are displayed and all M06-2X calculations in the main text have been carried out with the *ultrafine* integration grid. In addition, the wavenumber scaling factor *WNSF* is listed. *WNSF* is determined with respect to the experimental band position of the OH stretching vibration of the [Oa,Oc] conformer of Na<sup>+</sup>GlyGly (3556 cm<sup>-1</sup>), see ref. [5] for further details.

| Method           | Program  | Keywords                                                                                                                                            | WNSF  |
|------------------|----------|-----------------------------------------------------------------------------------------------------------------------------------------------------|-------|
| B3LYP-D3(BJ)     | GAUSSIAN | B3LYP EmpiricalDispersion=GD3BJ def2TZVP Opt=Tight<br>Integral(Grid=UltraFineGrid) DenFit Freq                                                      | 0.964 |
| B3LYP            | GAUSSIAN | B3LYP def2TZVP Opt=Tight<br>Integral(Grid=UltraFineGrid) DenFit Freq                                                                                | 0.964 |
| ωB97XD           | GAUSSIAN | wB97XD def2TZVP Opt=Tight<br>Integral(Grid=UltraFineGrid) DenFit Freq                                                                               | 0.939 |
| M06-2X           | GAUSSIAN | M062X def2TZVP Opt=Tight<br>Integral(Grid=UltraFineGrid) DenFit Freq                                                                                | 0.945 |
| M06-2X           | GAUSSIAN | M062X def2TZVP Opt=Tight<br>Integral(Grid=SuperFineGrid) DenFit Freq                                                                                | 0.945 |
| PM3              | GAUSSIAN | PM3 Opt=Tight DenFit Freq                                                                                                                           | 0.933 |
| RI-B2PLYP-D3(BJ) | ORCA     | RI-B2PLYP D3BJ aug-cc-pVTZ AutoAux D3BJ GRID5 NOFINALGRID<br>VERYTIGHTSCF TIGHTOPT NUMFREQ printbasis<br>%basis<br>newgto Li "cc-pwCVTZ" end<br>end | 0.958 |
| RI-MP2           | ORCA     | RI-MP2 aug-cc-pVTZ AutoAux VERYTIGHTSCF TIGHTOPT<br>NUMFREQ printbasis<br>%basis<br>newgto Li "cc-pwCVTZ" end<br>end                                | 0.958 |
| DLPNO-CCSD(T)    | ORCA     | DLPNO-CCSD(T) aug-cc-pVXZ AutoAux TIGHTSCF TightPNO printbasis<br>%basis<br>newgto Li "cc-pwCVXZ" end<br>end                                        |       |

**Table S2:** Relative energy difference of DLPNO-CCSD(T)/aVQZ\* single-point energies of the lowest-energy conformers of Li<sup>+</sup>GlyGly-*n*H<sub>2</sub>O (*n* = 0 – 2) on structures optimised with DFT and MP2 (cf. Figure 2 of main text and Figure S2 for structures).

| Conformer                        | Li <sup>+</sup> GlyGly |           | Li <sup>+</sup> GlyGly-1H <sub>2</sub> O |                         |                         | Li <sup>+</sup> GlyGly-2H <sub>2</sub> O |             |                           |
|----------------------------------|------------------------|-----------|------------------------------------------|-------------------------|-------------------------|------------------------------------------|-------------|---------------------------|
|                                  | [Oa,Oc]                | [N,Oa,Oc] | [Oa,Oc,W]                                | [W <sub>N</sub> ,Oa,Oc] | [N,Oa,W <sub>Oc</sub> ] | [W <sub>N</sub> ,Oa,W <sub>Oc</sub> ]    | [Oa,Oc,W,W] | [W <sub>N</sub> ,Oa,Oc,W] |
| B3LYP-D3(BJ)/def2TZVP            | 0.2                    | 0.3       | 0.4                                      | 0.5                     | 0.5                     | 0.7                                      | 0.8         | 0.7                       |
| B3LYP/def2TZVP                   | 0.6                    | 0.6       | 0.7                                      | 1.3                     | 0.8                     | 1.6                                      | 1.4         | 1.3                       |
| ωB97XD/def2TZVP                  | 1.4                    | 1.0       | 1.5                                      | 1.4                     | 1.4                     | 1.9                                      | 2.3         | 1.9                       |
| M06-2X/def2TZVP                  | 0.5                    | 0.6       | 0.7                                      | 1.3                     | 1.0                     | 1.5                                      | 1.3         | 1.3                       |
| M06-2X/def2TZVP <i>superfine</i> | 0.5                    | 0.6       | 0.7                                      | 1.3                     | 0.9                     | 1.4                                      | 1.3         | 1.4                       |
| B2PLYP-D3(BJ)/aVTZ*              | 0.0                    | 0.0       | 0.0                                      | 0.0                     | 0.0                     | 0.0                                      | 0.0         | 0.0                       |
| MP2/aVTZ*                        | 0.2                    | 0.2       | 0.2                                      | 0.2                     | 0.3                     | 0.2                                      | 0.3         | 0.3                       |
| PM3                              | 46.3                   | 57.1      | 52.2                                     | 45.5                    | 44.5                    | 43.9                                     | 55.5        | 43.5                      |

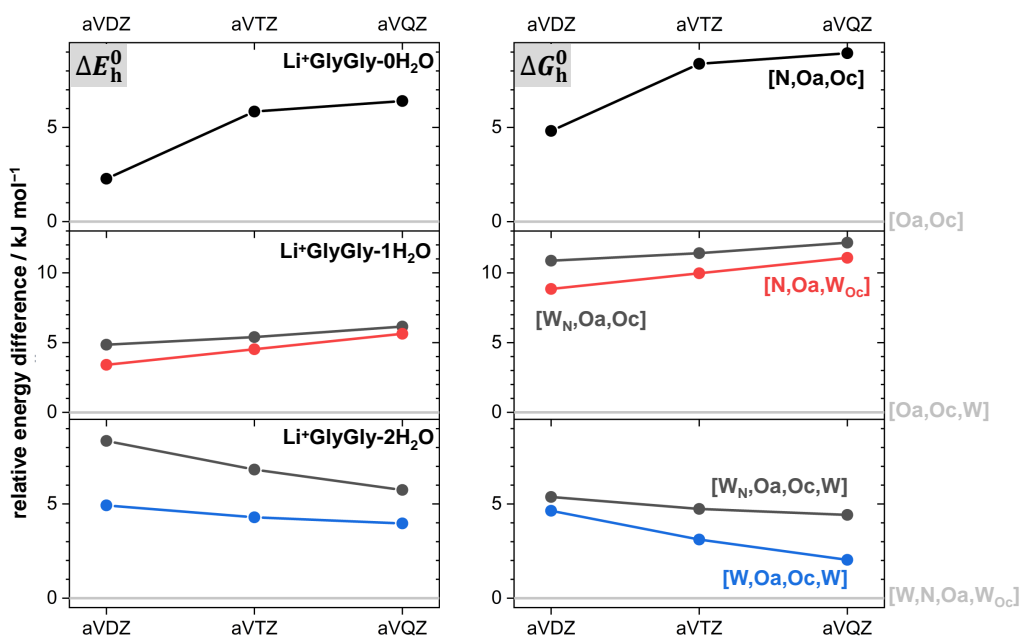**Fig. S1:** Relative harmonic, zero-point corrected energy differences  $\Delta E_h^0$  (left) and relative Gibbs free energy differences  $\Delta G_h^0$  (right) of different conformers of Li<sup>+</sup>GlyGly-*n*H<sub>2</sub>O complexes with *n* = 0 – 2 at the DLPNO-CCSD(T)/aVXZ\*/MP2/aVTZ\* level as a function of the basis set size with X=D, T, and Q. Note that the energies have not been corrected for the basis set superposition error (BSSE), whereas all other energies displayed throughout this work have been BSSE corrected. The conformers are displayed in Figure S2.**Table S3:** Deviations of scaled ( $\times 0.964$ ) harmonic vibrational frequency calculations of Li<sup>+</sup>GlyGly-*n*H<sub>2</sub>O and Li<sup>+</sup>GlyGly-*n*H<sub>2</sub>O-1D<sub>2</sub> with *n* = 0, 1 at the B3LYP-D3(BJ)/def2TZVP level with respect to experiment for different types of vibrations (in cm<sup>-1</sup>).  $\Delta_{\text{OH}}$  marks the deviation for the OH stretch,  $\Delta_{\text{NH}_2^{\text{a,s}}}$  marks deviations for the antisymmetric and symmetric NH<sub>2</sub> stretches,  $\Delta_{\text{NH}^{\text{b}}}$  represents the deviation for the hydrogen bonded NH stretch, and  $\Delta_{\text{H}_2\text{O}^{\text{s,a,b,f}}}$  represents the deviations for the symmetric, antisymmetric, hydrogen bonded and free H<sub>2</sub>O stretching vibrations. The average absolute deviations over all modes with and without the inclusion of the D<sub>2</sub> tag are with 14.0 cm<sup>-1</sup> and 14.1 cm<sup>-1</sup> very similar.

| Complex                                                  | Conformer               | $\Delta_{\text{OH}}$ | $\Delta_{\text{NH}_2^{\text{a}}}$ | $\Delta_{\text{NH}_2^{\text{s}}}$ | $\Delta_{\text{NH}^{\text{b}}}$ | $\Delta_{\text{H}_2\text{O}^{\text{s}}}$ | $\Delta_{\text{H}_2\text{O}^{\text{a}}}$ | $\Delta_{\text{H}_2\text{O}^{\text{b}}}$ | $\Delta_{\text{H}_2\text{O}^{\text{f}}}$ |
|----------------------------------------------------------|-------------------------|----------------------|-----------------------------------|-----------------------------------|---------------------------------|------------------------------------------|------------------------------------------|------------------------------------------|------------------------------------------|
| Li <sup>+</sup> GlyGly                                   | [Oa,Oc]                 | 1.5                  | 22.0                              | 11.7                              | 21.7                            |                                          |                                          |                                          |                                          |
| Li <sup>+</sup> GlyGly-1H <sub>2</sub> O                 | [Oa,Oc,W]               | 1.3                  | 24.2                              | 14.2                              | 21.4                            | -7.8                                     | -6.4                                     |                                          |                                          |
|                                                          | [N,Oa,W <sub>Oc</sub> ] | 4.4                  |                                   |                                   |                                 |                                          |                                          | -45.9                                    | -0.7                                     |
| Li <sup>+</sup> GlyGly-1D <sub>2</sub>                   | [Oa,Oc]                 | 2.7                  | 22.2                              | 11.8                              | 24.7                            |                                          |                                          |                                          |                                          |
| Li <sup>+</sup> GlyGly-1H <sub>2</sub> O-1D <sub>2</sub> | [Oa,Oc,W]               | 0.0                  | 22.4                              | 12.4                              | 21.4                            | -7.1                                     | -3.5                                     |                                          |                                          |
|                                                          | [N,Oa,W <sub>Oc</sub> ] | 2.6                  |                                   |                                   |                                 |                                          |                                          | -49.2                                    | -2.3                                     |

## 2 Spectral analysis of the Li<sup>+</sup>GlyGly-*n*H<sub>2</sub>O spectra

An overview of the assignments of the experimental bands in the Li<sup>+</sup>GlyGly-*n*H<sub>2</sub>O-1D<sub>2</sub> (*n* = 0, 1) and Li<sup>+</sup>GlyGly-2H<sub>2</sub>O spectra can be found in Table S4. Harmonic BSSE corrected relative Gibbs free energy differences  $\Delta G_h^0$  and BSSE and zero-point corrected relative energy differences  $\Delta E_h^0$  of the lowest-energy conformers of Li<sup>+</sup>GlyGly-1H<sub>2</sub>O and Li<sup>+</sup>GlyGly-2H<sub>2</sub>O calculated using various methods can be found in Tables S5 and S6. Additional higher-energy conformers for the Li<sup>+</sup>GlyGly-*n*H<sub>2</sub>O clusters with *n* = 1, 2 are shown in Figure S2 alongside relative DLPNO-CCSD(T)/aVQZ\*\*//MP2/aVTZ\* energy differences.

### 2.1 Overview over the experimental results

**Table S4:** Experimental band positions (in cm<sup>-1</sup>) and conformer assignments.

| Complex                                  | Conformer                 | $\nu\text{NH}^b$ | $\nu\text{NH}_2^s$ | $\nu\text{NH}_2^a$ | $\nu\text{NH}^f$ | $\nu\text{OH}$ | $\nu\text{H}_2\text{O}^s$ | $\nu\text{H}_2\text{O}^a$ | $\nu\text{H}_2\text{O}^b$ | $\nu\text{H}_2\text{O}^f$ |
|------------------------------------------|---------------------------|------------------|--------------------|--------------------|------------------|----------------|---------------------------|---------------------------|---------------------------|---------------------------|
| Li <sup>+</sup> GlyGly                   | [Oa,Oc]                   | 3294             | 3396               | 3456               |                  | 3542           |                           |                           |                           |                           |
| Li <sup>+</sup> GlyGly-1H <sub>2</sub> O | [Oa,Oc,W]                 | 3316             | 3395               | 3455               |                  | 3552           | 3657                      | 3735                      |                           |                           |
|                                          | [N,Oa,W <sub>Oc</sub> ]   |                  |                    |                    |                  | 3573           |                           |                           | 3490                      | 3723                      |
| Li <sup>+</sup> GlyGly-2H <sub>2</sub> O | [W,N,Oa,W <sub>Oc</sub> ] |                  |                    |                    | 3481             | 3575           | 3659                      | 3744                      | 3505                      | 3722                      |
|                                          | [Oa,Oc,W,W]               | 3333             |                    |                    |                  | 3557           | 3659                      | 3744                      |                           |                           |

### 2.2 Conformer assignments

**Table S5:** BSSE corrected relative Gibbs free energy differences  $\Delta G_h^0$  of the lowest-energy conformers of Li<sup>+</sup>GlyGly-1H<sub>2</sub>O and Li<sup>+</sup>GlyGly-2H<sub>2</sub>O, calculated at the B3LYP-D3(BJ)/def2TZVP, B3LYP/def2TZVP,  $\omega$ B97XD/def2TZVP, M06-2X/def2TZVP, B2PLYP-D3(BJ)/aVTZ\*, and MP2/aVTZ\* levels. Additional single-point calculations were performed at the DLPNO-CCSD(T)/aVQZ\* level on the MP2/aVTZ geometries, which are listed using MP2/aVTZ\* zero-point and thermal corrections.

|                                          |                           | $\Delta G_h^0$ |       |                |        |           |      |               |
|------------------------------------------|---------------------------|----------------|-------|----------------|--------|-----------|------|---------------|
|                                          |                           | B3LYP-D3       | B3LYP | $\omega$ B97XD | M06-2X | B2PLYP-D3 | MP2  | DLPNO-CCSD(T) |
| Li <sup>+</sup> GlyGly-1H <sub>2</sub> O | [Oa,Oc,W]                 | 0.0            | 0.0   | 0.0            | 0.0    | 0.0       | 0.0  | 0.0           |
|                                          | [W <sub>N</sub> ,Oa,Oc]   | 17.2           | 23.4  | 17.3           | 14.2   | 12.3      | 12.9 | 13.3          |
|                                          | [N,Oa,W <sub>Oc</sub> ]   | 18.1           | 23.0  | 16.3           | 13.4   | 13.0      | 10.0 | 11.8          |
| Li <sup>+</sup> GlyGly-2H <sub>2</sub> O | [Oa,Oc,W,W]               | 0.0            | 0.0   | 0.0            | 0.0    | 0.1       | 2.4  | 1.1           |
|                                          | [W <sub>N</sub> ,Oa,Oc,W] | 6.1            | 11.5  | 5.3            | 6.0    | 3.0       | 5.6  | 4.8           |
|                                          | [W,N,Oa,W <sub>Oc</sub> ] | 3.3            | 7.7   | 1.3            | 2.2    | 0.0       | 0.0  | 0.0           |

**Table S6:** Zero-point and BSSE corrected relative energy differences  $\Delta E_h^0$  of the lowest-energy conformers of Li<sup>+</sup>GlyGly-1H<sub>2</sub>O and Li<sup>+</sup>GlyGly-2H<sub>2</sub>O, calculated at the B3LYP-D3(BJ)/def2TZVP, B3LYP/def2TZVP,  $\omega$ B97XD/def2TZVP, M06-2X/def2TZVP, B2PLYP-D3(BJ)/aVTZ\*, and MP2/aVTZ\* levels. Additional single-point calculations were performed at the DLPNO-CCSD(T)/aVQZ\* level on the MP2/aVTZ geometries, which are listed using MP2/aVTZ\* zero-point and thermal corrections.

|                                          |                           | $\Delta E_h^0$ |       |                |        |           |     |               |
|------------------------------------------|---------------------------|----------------|-------|----------------|--------|-----------|-----|---------------|
|                                          |                           | B3LYP-D3       | B3LYP | $\omega$ B97XD | M06-2X | B2PLYP-D3 | MP2 | DLPNO-CCSD(T) |
| Li <sup>+</sup> GlyGly-1H <sub>2</sub> O | [Oa,Oc,W]                 | 0.0            | 0.0   | 0.0            | 0.0    | 0.0       | 0.0 | 0.0           |
|                                          | [W <sub>N</sub> ,Oa,Oc]   | 6.9            | 13.5  | 5.2            | 2.1    | 6.8       | 6.9 | 7.3           |
|                                          | [N,Oa,W <sub>Oc</sub> ]   | 9.9            | 15.4  | 5.8            | 2.2    | 8.3       | 4.5 | 6.4           |
| Li <sup>+</sup> GlyGly-2H <sub>2</sub> O | [Oa,Oc,W,W]               | 3.4            | 0.0   | 5.9            | 8.3    | 3.9       | 6.2 | 4.9           |
|                                          | [W <sub>N</sub> ,Oa,Oc,W] | 1.4            | 4.0   | 3.4            | 3.9    | 2.4       | 5.1 | 4.4           |
|                                          | [W,N,Oa,W <sub>Oc</sub> ] | 0.0            | 1.4   | 0.0            | 0.0    | 0.0       | 0.0 | 0.0           |

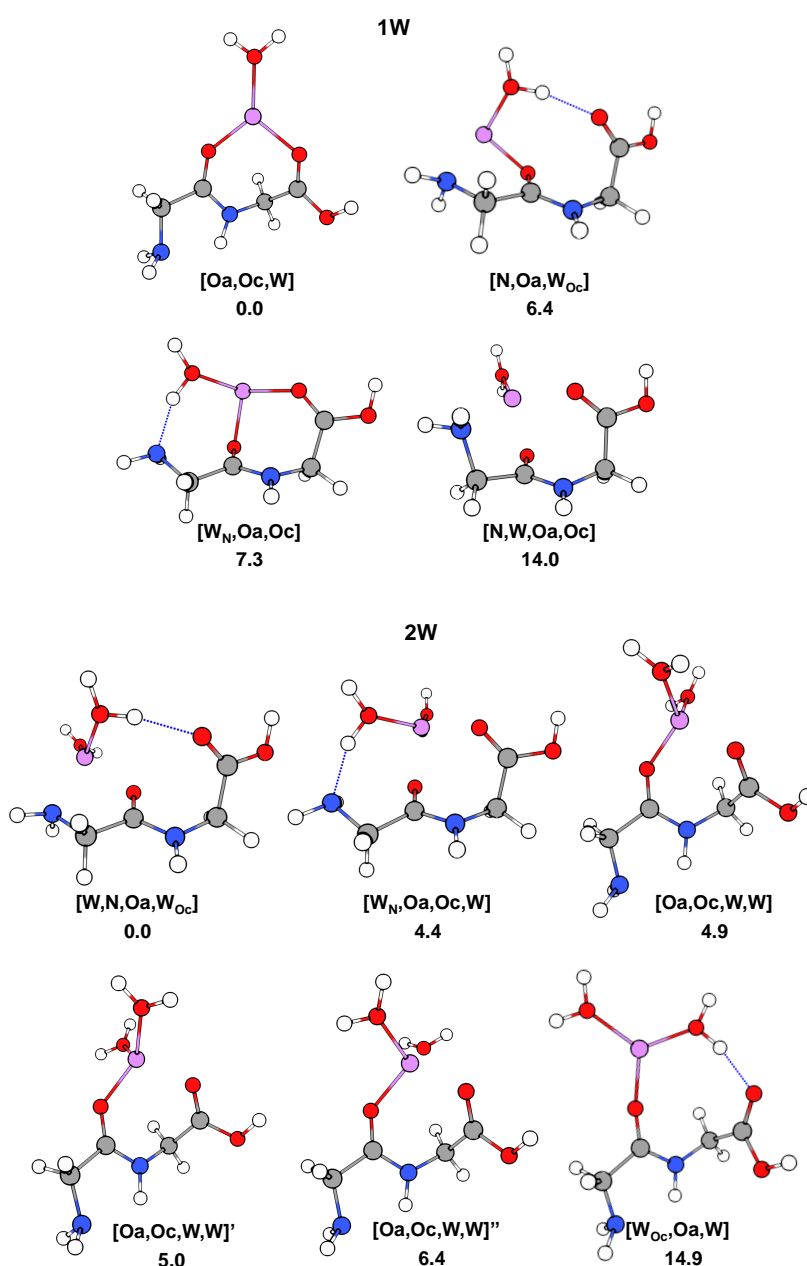

**Fig. S2:** Structures of the lowest-energy conformers of Li<sup>+</sup>GlyGly-*n*H<sub>2</sub>O complexes with *n* = 1 and 2 alongside relative harmonic and zero-point corrected energy differences  $\Delta E_h^0$  at the DLPNO-CCSD(T)/aVQZ\*//MP2/aVTZ\* level.

### 3 Agreement between experiment and theory

Table S7 lists the deviations between scaled harmonic vibrational frequency calculations and experiment for various methods including all vibrational modes assigned in the spectra (cf. Table S4). Compared to Table 1 in the main text, this table also includes the deviations for the symmetric and antisymmetric NH<sub>2</sub> stretching vibrations and the results for M06-2X/def2TZVP calculations using the finer *superfine* integration grid. The agreement between experiment and theory seems to improve for B3LYP-D3(BJ) if the dispersion correction is omitted. As seen in Table S2, the relative DLPNO-CCSD(T)/aVQZ\* energy difference of the B3LYP structure with respect to B2PLYP-D3(BJ) is higher than that of the B3LYP-D3(BJ) structure, meaning that it is further away from the DLPNO-CCSD(T)/aVQZ\* minimum. The improved vibrational description on a seemingly less-accurate structure could either be a geometric effect or a result of a better vibrational description. To investigate this, we have carried out a harmonic vibrational frequency calculation including the D3(BJ) dispersion on a geometry obtained without this correction and *vice versa* (e.g., B3LYP-D3(BJ)//B3LYP). The results of these calculations for the lowest-energy Li<sup>+</sup>GlyGly-1H<sub>2</sub>O and Li<sup>+</sup>GlyGly-2H<sub>2</sub>O conformers can be found in Tables S8 and S9, respectively. The resulting band positions of these cross-calculations resemble the ‘pure’ calculation (same method for the geometry optimisation and Hessian) that has the same geometry, indicating that the improvement of the vibrational frequencies by omitting the dispersion correction is largely a geometric effect.

**Table S7:** Total CPU times  $t_{\text{CPU}}$  (in h), average absolute deviations of scaled harmonic vibrational frequency calculations over all vibrational modes assigned in the Li<sup>+</sup>GlyGly-*n*H<sub>2</sub>O-1D<sub>2</sub> ( $n = 0, 1$ ) and Li<sup>+</sup>GlyGly-2H<sub>2</sub>O spectra ( $|\overline{\Delta_{\text{Oa}}}|$ ), and average deviations obtained for the OH  $\overline{\Delta_{\text{OH}}}$ , antisymmetric and symmetric NH<sub>2</sub>  $\overline{\Delta_{\text{NH}_2^{\text{a,s}}}}$ , hydrogen bonded NH  $\overline{\Delta_{\text{NH}^{\text{b}}}}$ , as well as free, antisymmetric, symmetric, and hydrogen bonded H<sub>2</sub>O vibrations  $\overline{\Delta_{\text{H}_2\text{O}^{\text{f,a,s,b}}}}$  (all in cm<sup>-1</sup>). The average deviations are displayed alongside their standard deviations in parenthesis. The free NH stretching vibration  $\nu(\text{NH})^{\text{f}}$  has only been observed for Li<sup>+</sup>GlyGly-2H<sub>2</sub>O ([W,N,Oa,W<sub>Oc</sub>] conformer) and is therefore displayed without a standard deviation ( $\Delta_{\text{NH}^{\text{f}}}$ ). Note that the asterisk (\*) at the aVTZ\* basis set indicates that for Li<sup>+</sup>, the aVTZ basis set has been replaced with the weighted core-valence cc-pwCVTZ basis set.

| Method                           | $t_{\text{CPU}}$ | $ \overline{\Delta_{\text{Oa}}} $ | $\overline{\Delta_{\text{OH}}}$ | $\overline{\Delta_{\text{NH}_2^{\text{a}}}}$ | $\overline{\Delta_{\text{NH}_2^{\text{s}}}}$ | $\Delta_{\text{NH}^{\text{f}}}$ | $\overline{\Delta_{\text{NH}^{\text{b}}}}$ | $\overline{\Delta_{\text{H}_2\text{O}^{\text{f,a,s}}}}$ | $\overline{\Delta_{\text{H}_2\text{O}^{\text{b}}}}$ |
|----------------------------------|------------------|-----------------------------------|---------------------------------|----------------------------------------------|----------------------------------------------|---------------------------------|--------------------------------------------|---------------------------------------------------------|-----------------------------------------------------|
| B3LYP-D3(BJ)/def2TZVP            | 10.5             | 11.1                              | 3(1)                            | 23(2)                                        | 13(2)                                        | 3.2                             | 21(0)                                      | -2(4)                                                   | -39(10)                                             |
| B3LYP/def2TZVP                   | 11.3             | 8.7                               | 2(1)                            | 22(1)                                        | 12(1)                                        | -0.5                            | 19(2)                                      | -3(3)                                                   | -22(2)                                              |
| $\omega$ B97XD/def2TZVP          | 15.2             | 15.3                              | -1(1)                           | -13(0)                                       | -26(0)                                       | -36.6                           | -3(3)                                      | -12(4)                                                  | -61(10)                                             |
| M06-2X/def2TZVP                  | 16.7             | 15.4                              | 0(2)                            | -6(2)                                        | -19(2)                                       | -31.7                           | 17(3)                                      | -17(4)                                                  | -37(4)                                              |
| M06-2X/def2TZVP <i>superfine</i> | 29.3             | 16.6                              | -1(1)                           | -9(1)                                        | -22(1)                                       | -35.7                           | 18(3)                                      | -18(4)                                                  | -37(3)                                              |
| B2PLYP-D3(BJ)/aVTZ*              | 6671.3           | 10.7                              | 0(1)                            | 24(0)                                        | 9(0)                                         | 2.3                             | 29(3)                                      | -4(4)                                                   | -29(1)                                              |
| MP2/aVTZ*                        | 6614.1           | 11.9                              | -1(1)                           | 39(1)                                        | 14(1)                                        | 10.9                            | 23(2)                                      | 4(9)                                                    | -10(2)                                              |
| PM3                              | 0.02             | 95.8                              | 3(5)                            | -284(0)                                      | -106(1)                                      | -333.0                          | -194(16)                                   | -64(30)                                                 | 3(2)                                                |

**Table S8:** Harmonically calculated band positions of the three lowest-energy Li<sup>+</sup>GlyGly-1H<sub>2</sub>O conformers using optimised geometries and Hessians computed at the B3LYP-D3(BJ)/def2TZVP and B3LYP/def2TZVP levels. The methods are displayed as geometry optimisation//frequency calculation, meaning B3LYP-D3(BJ)//B3LYP refers to a B3LYP frequency calculation on an optimised B3LYP-D3(BJ) geometry.

| Conformer               | Method             | $\omega(\text{H}_2\text{O})^a$ | $\omega(\text{H}_2\text{O})^f$ | $\omega(\text{H}_2\text{O})^s$ | $\omega(\text{OH})$ | $\omega(\text{NH})^f$ | $\omega(\text{H}_2\text{O})^b$ | $\omega(\text{NH}_2)^a$ | $\omega(\text{NH}_2)^a$ | $\omega(\text{NH})^f$ |
|-------------------------|--------------------|--------------------------------|--------------------------------|--------------------------------|---------------------|-----------------------|--------------------------------|-------------------------|-------------------------|-----------------------|
| [Oa,Oc,W]               | B3LYP-D3//B3LYP-D3 | 3869                           |                                | 3786                           | 3685                |                       |                                | 3610                    | 3537                    | 3461                  |
|                         | B3LYP-D3//B3LYP    | 3870                           |                                | 3786                           | 3685                |                       |                                | 3610                    | 3537                    | 3461                  |
|                         | B3LYP//B3LYP       | 3868                           |                                | 3785                           | 3684                |                       |                                | 3607                    | 3534                    | 3458                  |
|                         | B3LYP//B3LYP-D3    | 3868                           |                                | 3785                           | 3684                |                       |                                | 3607                    | 3534                    | 3458                  |
| [N,Oa,W <sub>oc</sub> ] | B3LYP-D3//B3LYP-D3 |                                | 3861                           |                                | 3711                | 3613                  | 3573                           | 3557                    | 3489                    |                       |
|                         | B3LYP-D3//B3LYP    |                                | 3862                           |                                | 3711                | 3613                  | 3573                           | 3557                    | 3489                    |                       |
|                         | B3LYP//B3LYP       |                                | 3859                           |                                | 3710                | 3609                  | 3598                           | 3554                    | 3488                    |                       |
|                         | B3LYP//B3LYP-D3    |                                | 3859                           |                                | 3709                | 3610                  | 3598                           | 3554                    | 3488                    |                       |
| [W <sub>N</sub> ,Oa,Oc] | B3LYP-D3//B3LYP-D3 |                                | 3867                           |                                | 3692                | 3613                  | 3164                           | 3564                    | 3490                    |                       |
|                         | B3LYP-D3//B3LYP    |                                | 3868                           |                                | 3693                | 3613                  | 3164                           | 3564                    | 3490                    |                       |
|                         | B3LYP//B3LYP       |                                | 3864                           |                                | 3691                | 3609                  | 3214                           | 3560                    | 3488                    |                       |
|                         | B3LYP//B3LYP-D3    |                                | 3864                           |                                | 3691                | 3609                  | 3214                           | 3560                    | 3488                    |                       |

**Table S9:** Harmonically calculated band positions of the three lowest-energy Li<sup>+</sup>GlyGly-2H<sub>2</sub>O conformers using optimised geometries and Hessians at the B3LYP-D3(BJ)/def2TZVP and B3LYP/def2TZVP level. The methods are displayed as geometry optimisation//frequency calculation, meaning B3LYP-D3(BJ)//B3LYP refers to a B3LYP frequency calculation on an optimised B3LYP-D3(BJ) geometry.

| Conformer                 | Method             | $\omega(\text{H}_2\text{O})^a$ | $\omega(\text{H}_2\text{O})^f$ | $\omega(\text{H}_2\text{O})^s$ | $\omega(\text{OH})$ | $\omega(\text{NH})^f$ | $\omega(\text{H}_2\text{O})^b$ | $\omega(\text{NH}_2)^a$ | $\omega(\text{NH}_2)^a$ | $\omega(\text{NH})^f$ |
|---------------------------|--------------------|--------------------------------|--------------------------------|--------------------------------|---------------------|-----------------------|--------------------------------|-------------------------|-------------------------|-----------------------|
| [W,N,Oa,W <sub>oc</sub> ] | B3LYP-D3//B3LYP-D3 | 3879                           | 3863                           | 3791                           | 3712                | 3614                  | 3590                           | 3567                    | 3495                    |                       |
|                           | B3LYP-D3//B3LYP    | 3879                           | 3864                           | 3791                           | 3712                | 3614                  | 3590                           | 3567                    | 3495                    |                       |
|                           | B3LYP//B3LYP       | 3876                           | 3861                           | 3790                           | 3711                | 3611                  | 3610                           | 3564                    | 3494                    |                       |
|                           | B3LYP//B3LYP-D3    | 3876                           | 3861                           | 3789                           | 3710                | 3611                  | 3610                           | 3564                    | 3494                    |                       |
| [Oa,Oc,W,W]               | B3LYP-D3//B3LYP-D3 | 3886, 3882                     |                                | 3796, 3790                     | 3694                |                       |                                | 3609                    | 3535                    | 3479                  |
|                           | B3LYP-D3//B3LYP    | 3887, 3882                     |                                | 3796, 3790                     | 3694                |                       |                                | 3609                    | 3535                    | 3479                  |
|                           | B3LYP//B3LYP       | 3885, 3883                     |                                | 3794, 3791                     | 3693                |                       |                                | 3606                    | 3533                    | 3476                  |
|                           | B3LYP//B3LYP-D3    | 3884, 3883                     |                                | 3794, 3791                     | 3692                |                       |                                | 3606                    | 3533                    | 3476                  |
| [W <sub>N</sub> ,Oa,Oc,W] | B3LYP-D3//B3LYP-D3 | 3883                           | 3872                           | 3793                           | 3700                | 3618                  | 3230                           | 3568                    | 3493                    |                       |
|                           | B3LYP-D3//B3LYP    | 3883                           | 3873                           | 3793                           | 3700                | 3617                  | 3230                           | 3568                    | 3493                    |                       |
|                           | B3LYP//B3LYP       | 3880                           | 3869                           | 3792                           | 3699                | 3613                  | 3274                           | 3564                    | 3491                    |                       |
|                           | B3LYP//B3LYP-D3    | 3880                           | 3869                           | 3792                           | 3699                | 3613                  | 3274                           | 3564                    | 3491                    |                       |

## 4 Tentative analysis of the Li<sup>+</sup>GlyGly-3H<sub>2</sub>O spectra

In Figure S3, the lowest-energy conformers of Li<sup>+</sup>GlyGly-3H<sub>2</sub>O are shown alongside harmonic, zero-point and BSSE corrected relative energy differences  $\Delta E_h^0$  and relative Gibbs free energy differences  $\Delta G_h^0$ , calculated at the DLPNO-CCSD(T)/aVQZ\*//B3LYP-D3(BJ)/def2TZVP level. The wavenumber-scaled, harmonic vibrational spectra calculated at the B3LYP/def2TZVP level are shown in Figure S4.

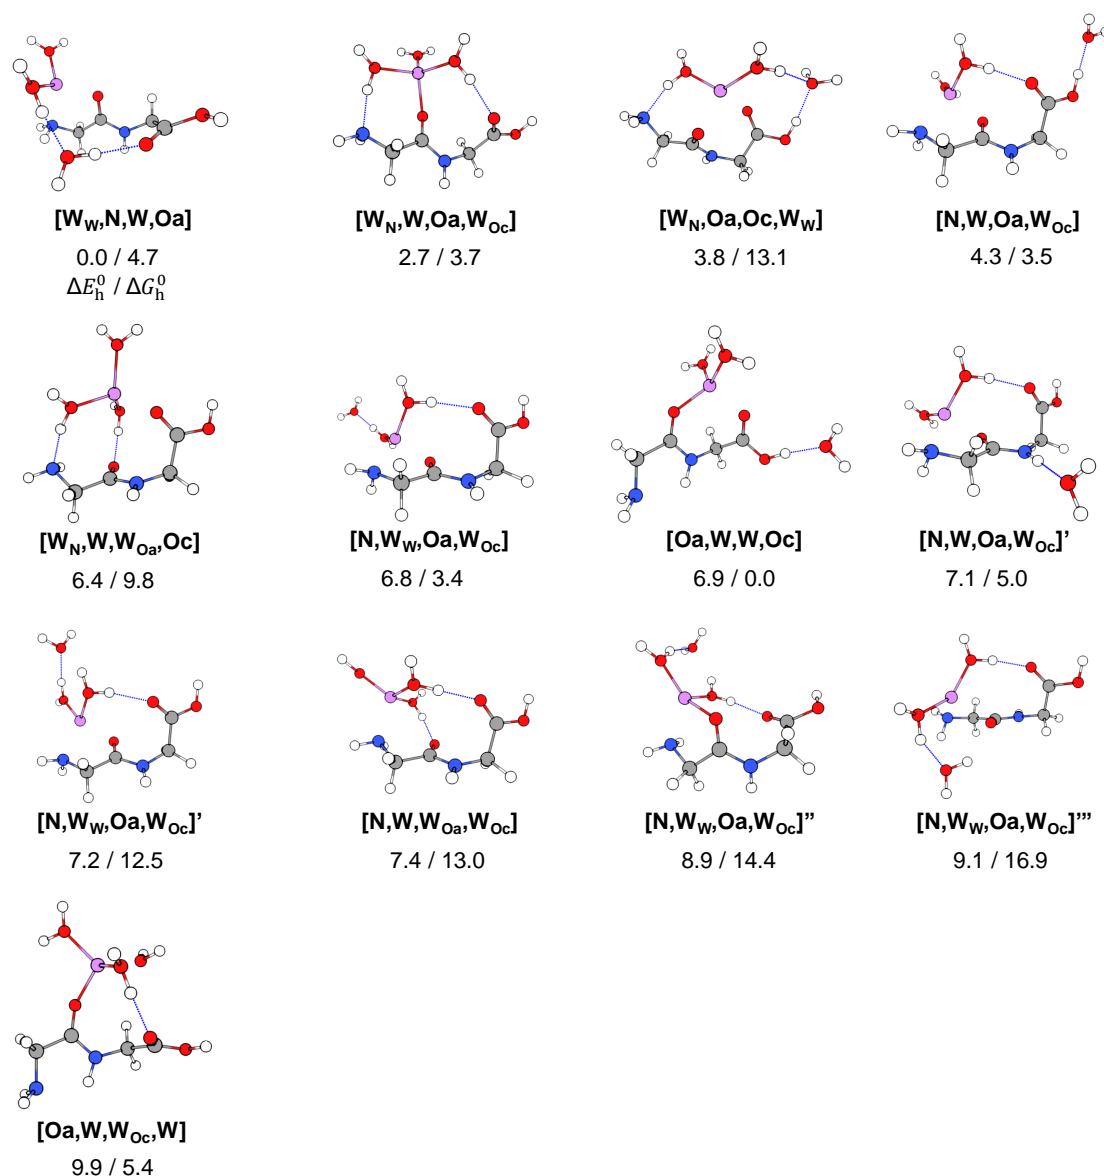

**Fig. S3:** Lowest-energy conformers of Li<sup>+</sup>GlyGly-3H<sub>2</sub>O. Oa and Oc in the conformer labels indicate metal ion coordination to the amide and carboxylic C=O groups, N metal ion coordination to the lone pair of the NH<sub>2</sub> group, W indicates water coordination to Li<sup>+</sup>, and subscripts illustrate the location of hydrogen bonds originating from the respective metal ion binding sites. Harmonic zero-point and BSSE corrected relative energy differences  $\Delta E_h^0$  and relative Gibbs free energy differences  $\Delta G_h^0$  are listed below the conformers, calculated at the DLPNO-CCSD(T)/aVQZ\*//B3LYP-D3(BJ)/def2TZVP level.



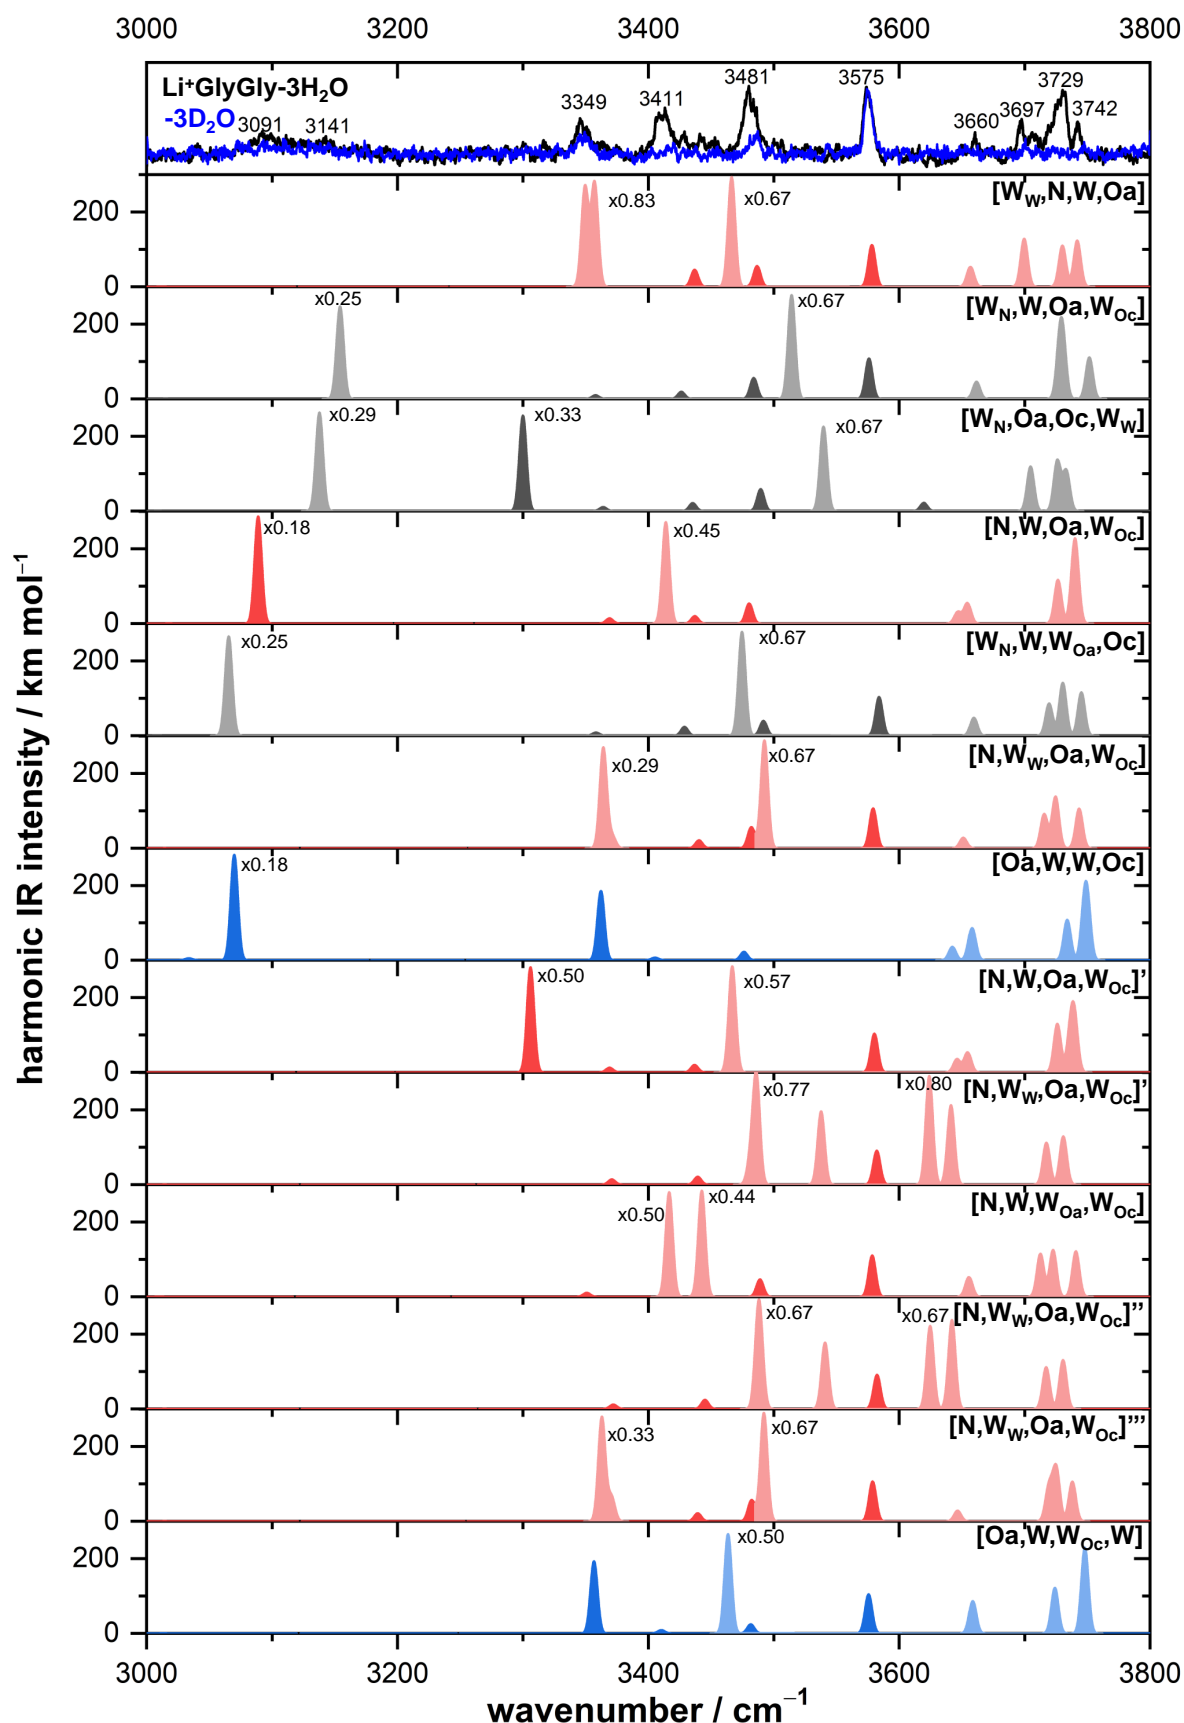

**Fig. S4:** Infrared action spectra of Li<sup>+</sup>GlyGly-3H/D<sub>2</sub>O alongside harmonically calculated, scaled ( $\times 0.964$ ) and Gaussian-broadened ( $\sigma = 4 \text{ cm}^{-1}$ ) spectra of the lowest-energy conformers at the B3LYP/def2TZVP level. Predicted bands corresponding to water vibrations are shown in a lighter and peptide vibrations in a darker shade (grey/blue/red), respectively. Note that the spectra were recorded *via* water-loss. BSSE and zero-point corrected relative energy differences and relative Gibbs free energy differences of the different conformers calculated at the DLPNO-CCSD(T)/aVQZ\*//B3LYP-D3(BJ)/def2TZVP level can be found in Figure S3 ( $\Delta E_h^0/\Delta G_h^0$ , in  $\text{kJ mol}^{-1}$ ).

## References

- [1] M. J. Frisch, G. W. Trucks, H. B. Schlegel, G. E. Scuseria, M. A. Robb, J. R. Cheeseman, G. Scalmani, V. Barone, G. A. Petersson, H. Nakatsuji, X. Li, M. Caricato, A. V. Marenich, J. Bloino, B. G. Janesko, R. Gomperts, B. Mennucci, H. P. Hratchian, J. V. Ortiz, A. F. Izmaylov, J. L. Sonnenberg, D. Williams-Young, F. Ding, F. Lipparini, F. Egidi, J. Goings, B. Peng, A. Petrone, T. Henderson, D. Ranasinghe, V. G. Zakrzewski, J. Gao, N. Rega, G. Zheng, W. Liang, M. Hada, M. Ehara, K. Toyota, R. Fukuda, J. Hasegawa, M. Ishida, T. Nakajima, Y. Honda, O. Kitao, H. Nakai, T. Vreven, K. Throssell, J. A. Montgomery, Jr., J. E. Peralta, F. Ogliaro, M. J. Bearpark, J. J. Heyd, E. N. Brothers, K. N. Kudin, V. N. Staroverov, T. A. Keith, R. Kobayashi, J. Normand, K. Raghavachari, A. P. Rendell, J. C. Burant, S. S. Iyengar, J. Tomasi, M. Cossi, J. M. Millam, M. Klene, C. Adamo, R. Cammi, J. W. Ochterski, R. L. Martin, K. Morokuma, O. Farkas, J. B. Foresman, D. J. Fox, Gaussian 16 Revision C.01, Gaussian Inc. Wallingford CT, **2019**.
- [2] F. Neese, *Wiley Interdiscip. Rev. Comput. Mol. Sci.* **2012**, *2*, 73–78.
- [3] F. Neese, *Wiley Interdiscip. Rev. Comput. Mol. Sci.* **2018**, *8*, e1327.
- [4] F. Neese, F. Wennmohs, U. Becker, C. Riplinger, *J. Chem. Phys.* **2020**, *152*, 224108.
- [5] K. A. E. Meyer, K. A. Nickson, E. Garand, *J. Chem. Phys.* **2022**, *157*, 174301.
